# Supplementary material
Source: publisher site journal article supplement (https://www.dovepress.com/article/235429)
Supplement: Supplementary file 1 [file get_supplementary_file.php]

**Table S1** Description of search strategy of PubMed database

| **Search** | **Query** |
| --- | --- |
| #1 | Hysterectomy, Vaginal [MH] |
| #2 | Hysterectom* |
| #3 | Gynecologic Surgical Procedures [MH] |
| #4 | #1 OR #2 OR #3 |
| #5 | Cesarean Section [MH] |
| #6 | (caesarean* or cesarean*) |
| #7 | (deliver* AND abdom*) |
| #8 | c-section* |
| #9 | (caesar* AND sectio*) |
| #10 | (cesarean* AND sectio*) |
| #11 | uterine scar* |
| #12 | #5 or #6 or #7 or #8 or #9 or #10 or #11 |
| #13 | (previous or prior) |
| #14 | #12 and #13 |
| #15 | Postoperative Complications [MH] |
| #16 | Postoperative complication* |
| #17 | Intraoperative Complications [MH] |
| #18 | Intraoperative Complication* |
| #19 | peroperative complication* OR perioperative complication* |
| #20 | surgical injur* |
| #21 | Blood loss, surgical [MH] |
| #22 | Surgical blood los* |
| #23 | surgical hemorrhage* |
| #24 | Blood los* |
| #25 | Surgical Wound Infection [MH] |
| #26 | infection* |
| #27 | #15 or #16 or #17 or #18 or #19 or #20 or #21 or #22 or #23 or #24 or #25 or #26 |
| #28 | #4 and #14 and #27 |

**Table S2** List of studies excluded due to unavailable full texts

| 1. Castro C. P, Bravo Oliva E, Bennett Ramírez C, Franck K. C, Prado González J, Carmona Bello A. Histerectomía vaginal en pacientes con antecedentes de cicatriz de cesárea TT - Vaginal hysterectomy in patients with previous cesarean section. Rev Chil Obs Ginecol. 2001;66(6):492-496. |
| --- |
| 2. Malinowski A, Bobin L, Maciołek-Blewniewska G. Significance of laparoscopic assistance in vaginal hysterectomy. Ginekol Pol. 2005;76(1):20-27. |
| 3. Shava J, Nene NL, Mpande L. Vaginal hysterectomy. A five year prospective descriptive study. Cent Afr J Med. 2004;50:61-65. |
| 4. Tan A, Ramesh K, Awan M, Morsi H. Benefits of laparoscopy versus laparotomy in managing general gynaecology amongst women with obesity or complex surgeries: An evaluation of 400 cases. BJOG An Int J Obstet Gynaecol. 2015;122:97-98. |

**Table S3** Characteristics of included studies

| **Study** | **Country** | **Study design** | **Pe**  **riod** | **Indication for hysterectomy** | **With previous CS** | | | | | | **Without previous CS** | | | | | **Adjusted risk factors** |
| --- | --- | --- | --- | --- | --- | --- | --- | --- | --- | --- | --- | --- | --- | --- | --- | --- |
| **n** | **Age** | **BMI** | **Parity** | **Route** | **No. CS** | **n** | **Age** | **BMI** | **Parity** | **Route** |
| Boukerrou,2003  (ref 14) | FRA | Cohort study | 1991  to 1998 | Benign indications | 71 | 44.7 * | 27.3 * | 2.4 * | VH (100%) | Not stated | 670 | 46.5 * | 25.4 * | 2.6 * | VH (100%) | No adjustment |
| Brummer,  2011  (ref 4) | FIN | Cohort study | 1 Jan  to  31 Dec 2006 | Benign indications | Not  stated | Not  stated | Not  stated | Not  stated | AH  LH  VH | Not  stated | Not  stated | Not  stated | Not  stated | Not  stated | AH  LH  VH | Hospital type, surgeon’s experience, patients’ age, BMI, indication for hysterectomy, prior laparotomy, prior laparoscopy, adhesiolysis, concomitant surgery, uterine size, antibiotic, thrombosis prophylaxis. |
| Celle,  2015  (ref 15) | CHL | Cohort study | 2006  to 2014 | Main indications  1) Myoma  2) Adeno-miosis  3) Endometrial cancer | 181 | Not  stated | Not stated | Not stated | LH (98.4%)  AH (1.6%) | 1  (55%)  >2  (45%) | 273 | Not stated | Not stated | Not stated | LH (99.3%)  AH (0.7%) | No adjustment |
| Chang  2005  (ref 16) | TWN | Cohort study | Aug 2002  to  Aug  2004 | 1) Uterine myomas  2) Adenomyosis | 49 | Not  stated | Not  stated | Not  stated | LAVH  (100%) | Not  stated | 176 | Not  stated | Not  stated | Not  stated | LAVH  (100%) | No adjustment |
| Coulam,  1973  (ref 17) | USA | Cohort study | 1961  to 1971 | Not stated | 621 | Not  stated | Not stated | Not stated | VH (100%) | Not stated | 942 | Not stated | Not stated | Not stated | VH (100%) | No adjustment |
| Duong,  2014  (ref 18) | USA | Cohort study | 2000  to  2009 | Benign indications | 284 | 43.0  (0.4) † | Not stated | 2.9  (0.1) † | AH (70%)  VH (20%)  LAVH (10%) | > 2 (100%) | 1,930 | 44.8  (0.2) † | Not stated | 2.3  (0.0) † | AH (51%)  VH (40%)  LAVH (9%) | No adjustment |
| Hesselman,  2017  (ref 19) | SWE | Cohort study | 2000  to  2014 | Benign indications | 5,152 | 47  (37, 54) ‡ | 26  (21, 33) ‡ | Not stated | AH (75%)  VH (16%)  LAVH (9%) | Not stated | 20,202 | 47  (39, 59) ‡ | 25  (21, 32) ‡ | Not stated | AH (60%)  VH (31%)  LAVH (9%) | Type of surgery, age, BMI, bowel/pelvic surgery, endometriosis and smoking |
| Hobson,  2013  (ref 20) | USA | Cohort study | 2003  to 2009 | Benign indications | 205 | Not  stated | Not stated | Not stated | LH  LAVH | Not stated | 594 | Not stated | Not stated | Not stated | LH  LAVH | BMI, estimated blood loss, uterine weight and concomitant adhesiolysis |
| I ̇nan,  2019  (ref 21) | TUR | Cohort study | 1 Jan 2015 to 31 Oct 2017 | Benign indications | 57 | Not  stated | Not  stated | Not  stated | LH (100%) | Not  stated | 490 | Not  stated | Not  stated | Not  stated | LH (100%) | No adjustment |
| Jo,  2013  (ref 22) | KOR | Cohort study | 2008  to  2012 | 1) Myoma  2) Endometrial  3) Cervical disease | 98 | 44  (34, 54) ‡ | 22.8  (17, 35) ‡ | Not  stated | LH (42%)  LAVH (58%) | 1  (40.8%)  >2  (59.2) | 202 | 46  (32, 58) ‡ | 22.9  (18, 36) ‡ | Not  stated | LH (32%)  LAVH (68%) | No adjustment |
| Koroglu,  2018  (ref 23) | TUR | Cohort study | May 2013 to May 2017 | Main indications  1) Myoma uteri  2) Abnormal bleeding  3) Endometrial hyperplasia | 59 | 46.8  (5.5) § | 32.7  (5.7) § | 3.4  (2.2) § | LH (100%) | Not  stated | 446 | 49  (6.3) § | 31.7  (5.2) § | 3.5  (2.1) § | LH (100%) | No adjustment |
| Lee,  2016  (ref 24) | USA | Cohort study | 2008 to 2010 | Main indications  1) Uterine fibroids  2) Pelvic mass  3) Abnormal uterine bleeding | 254 | Not  stated | Not  stated | Not  stated | AH  LH  VH  Robot | Not  stated | 1,395 | Not  stated | Not  stated | Not  stated | AH  LH  VH  Robot | No adjustment |

**Table S3** Characteristics of included studies (Continued)

| **Study** | **Country** | **Study design** | **Pe**  **riod** | **Indication for hysterectomy** | **With previous CS** | | | | | | **Without previous CS** | | | | | **Adjusted risk factors** |
| --- | --- | --- | --- | --- | --- | --- | --- | --- | --- | --- | --- | --- | --- | --- | --- | --- |
| **n** | **Age** | **BMI** | **Parity** | **Route** | **No. CS** | **n** | **Age** | **BMI** | **Parity** | **Route** |
| Lim,  2017  (ref 25) | KOR | Cohort study | 2010  to 2015 | 1) Lymphadenec-  tomy  2) posterior vaginal colporrhaphy  3) tensionfree vaginal  4) obturator tape procedures | 158 | 47.8  (4.9) § | 24.0  (3.52) § | 2  (1, 4) ‡ | LH (98.8%)  AH (1.2%) | 1  (39.9%)  >2  (60.1%) | 324 | 50.3  (5.9) § | 23.8  (3.4) § | 2  (0, 5) ‡ | LH (99.4%)  AH (0.6%) | No adjustment |
| Lindquist,  2017  (ref 6) | DNK | Cohort study | 1993  to  2012 | Benign indications | 2,418 | CS = 1:  40.0 (5.3) §  CS > 2 38.2 (5.1) § | Not stated | Not stated | AH (42%)  VH (40%)  LAVH (18%) | 1  (70%)  >2 (30%) | 5,267 | 40.2  (5.3) § | Not stated | Not stated | AH (62%)  VH (17%)  LAVH (21%) | Age, individual income, hypertension, cardiovascular disease, breast cancer & colon cancer, previous abdominal surgery and route of hysterectomy |
| Mamik,  2014  (ref 26) | USA | Case-control study | 2007 to 2011 | Benign indications | Not  stated | Not  stated | Not  stated | Not  stated | AH  VH  LAVH  LASH  Robot | Not  stated | Not  stated | Not  stated | Not  stated | Not  stated | AH  VH  LAVH  LASH  Robot | Adjusted confounding factors but not stated the information |
| Morgan  2013  (ref 27) | MEX | Cohort study | 6 July 2009 to  30 Dec 2011 | 1) uterine fibroids  2) uterine abnormal bleeding  3) cervical squamous intra-epithelial lesion | 114 | Not  stated | Not  stated | Not  stated | LH  (100%) | Not  stated | 95 | Not  stated | Not  stated | Not  stated | LH  (100%) | No adjustment |
| Pillet,  2009  (ref 28) | FRA | Cohort study | Jan 1993 to July 2007 | Benign indications | 205 | Not  stated | Not  stated | Not  stated | LH (100%) | Not  stated | 1,296 | Not  stated | Not  stated | Not  stated | LH (100%) | No adjustment |
| Poindexter,  2001  (ref 29) | USA | Cohort study | 1993  to  1997 | Main indications  1) Menorrhagia  2) Fibroids with/without menor-rhagia  3) Cervical intraepi-thelial neoplasia  4) Pelvic relaxation with/without menor-rhagia  5) Pelvic pain | 104 | 40.9  (7.4) § | Not  stated | Not  stated | VH (100%) | 1  (56.7%)  >2  (43.3%) | 171 | 42.9  (7.6) § | Not  stated | Not  stated | VH (100%) | Fibroids, previous vaginal births, uterine weight and pelvic relaxation |
| Rooney,  2005  (ref 30) | USA | Matched  case-control study | 1998  to  2001 | Not stated | 42 | Not stated | Not stated | Not stated | AH  VH  LAVH | Not stated | 162 | Not stated | Not stated | Not stated | AH  VH  LAVH | Matching age, type of hysterectomy, primary and secondary diagnoses, the need for adhesiolysis & concurrent anti-incontinence procedure or procedure for pelvic organ prolapse or cystotomy |
| Saito,  2017  (ref 31) | JPN | Cohort study | 2009 to 2013 | Benign indications | 16 | Not  stated | Not  stated | Not  stated | LH (100%) | Not  stated | 141 | Not  stated | Not  stated | Not  stated | LH (100%) | BMI, width of uterus, ovarian endometrioma |
| Schmitt,  2019  (ref 32) | USA | Cohort study | 2009 to 2013 | Benign indications | 103 | Not  stated | Not  stated | Not  stated | VH (100%) | Not  stated | 587 | Not  stated | Not  stated | Not  stated | VH (100%) | Uterine weight >280 grams, age, history of hematologic co-morbidities, and preoperative diagnosis |

**Table S3** Characteristics of included studies (Continued)

| **Study** | **Country** | **Study design** | **Pe**  **riod** | **Indication for hysterectomy** | **With previous CS** | | | | | | **Without previous CS** | | | | | **Adjusted risk factors** |
| --- | --- | --- | --- | --- | --- | --- | --- | --- | --- | --- | --- | --- | --- | --- | --- | --- |
| **n** | **Age** | **BMI** | **Parity** | **Route** | **No. CS** | **n** | **Age** | **BMI** | **Parity** | **Route** |
| Sheth,  1995  (ref 33) | IND | Cohort study | 1967  to  1992 | Not stated | 220 | Not  stated | Not stated | Not stated | VH (100%) | Not stated | 200 | Not stated | Not stated | Not stated | VH (100%) | No adjustment |
| Sinha  2008  (ref 34) | IND | Cohort study | Jan 2005 to  Jan 2007 | 1) symptomatic leiomyomas  2) abnormal uterine bleeding | 132 | Not  stated | Not  stated | Not  stated | LH  (100%) | Not  stated | 218 | Not  stated | Not  stated | Not  stated | LH  (100%) | No adjustment |
| Song,  2012  (ref 35) | KOR | Cohort study | Jan  2000 to May 2008 | Main indications  1) Myoma and/or adenomyosis  2) Pelvic endometriosis  3) Cervical intraepithelial neoplasia | 276 | Not  stated | Not  stated | Not  stated | LAVH (100%) | 1  (50.4%)  >2  (49.6%) | 1,736 | Not  stated | Not  stated | Not  stated | LAVH (100%) | BMI, uterine weight, Oophorectomy, Myomectomy |
| Unger,  1998  (ref 36) | USA | Cohort study | 1995  to  1998 | Not stated | 35 | 40.0  (9.0) § | Not stated | 3.0  (2.0) § | VH (89%)  LAVH (11%) | Not stated | 186 | 46.2  (14.0) § | Not stated | 2.7  (2.0) § | VH (96%)  LAVH (4%) | No adjustment |
| Wang,  2010  (ref 37) | AUS | Cohort study | 2001  to 2007 | Main indications  1) Menorrhagia  2) Myoma  3) Prolapse | 141 | 42.5 ¶ | Not stated | Not stated | LAVH  LH  AH (11%) | 1  (51.8)  >2  (48.2%) | 433 | 46 ¶ | Not stated | Not stated | LAVH  LH  AH (5%) | Age |

**Notes:** * Not specify; † Mean (SE); ‡ Median (min max); § Mean (SD); ¶ Median.

**Abbreviations:** (ref), reference number of each study cited in main text; No. CS, number of previous caesarean section; CS, caesarean section; Route, route of operation; AH, abdominal hysterectomy; VH, vaginal hysterectomy; LH, Laparoscopic hysterectomy; LAVH, laparoscopic assisted vaginal hysterectomy; LASH, laparoscopic-assisted supracervical hysterectomy; Robot, robotic; AUS, Australia; CHL, Chile; DNK, Denmark; FIN, Finland; FRA, France; IND, India; JPN, Japan; KOR, Korea; MEX, Mexico; SWE, Sweden; TUR, Turkey; TWN, Taiwan; USA, United Stated of America.

**Table S4** Outcomes of included study

| **Outcomes** | **Included studies** | | | | | | | | | | | | | | | | | | | | | | | | | | **Total** |
| --- | --- | --- | --- | --- | --- | --- | --- | --- | --- | --- | --- | --- | --- | --- | --- | --- | --- | --- | --- | --- | --- | --- | --- | --- | --- | --- | --- |
| Boukerrou, 2003 (ref 14) | Brummer, 2011 (ref 4) | Celle, 2015 (ref 15) | Chang, 2005 (ref 16) | Coulam, 1973 (ref 17) | Duong, 2014 (ref 18) | Hesselman, 2017 (ref 19) | Hobson, 2013 (ref 20) | I nan, 2019 (ref 21) | Jo, 2013 (ref 22) | Koroglum, 2018 (ref 23) | Lee, 2016 (ref 24) | Lim, 2017 (ref 25) | Lingquist, 2017 (ref 6) | Mamik, 2014 (ref 26) | Morgan, 2013 (ref 27) | Pillet, 2009 (ref 28) | Poindexter, 2001 (ref 29) | Rooney, 2005 (ref 30) | Saito, 2017 (ref 31) | Schmitt, 2019 (ref 32) | Sheth, 1995 (ref 33) | Sinha, 2008 (ref 34) | Song, 2012 (ref 35) | Unger, 1998 (ref 36) | Wang, 2010 (ref 37) |
| **Crude analysis** |  |  |  |  |  |  |  |  |  |  |  |  |  |  |  |  |  |  |  |  |  |  |  |  |  |  |  |
| Urinary tract injury | X |  | X | X |  | X | X |  | X |  | X |  | X |  |  | X | X | X | X CC |  |  |  | X |  | X | X | 15 |
| Wound complications |  |  | X |  |  | X | X |  |  | X |  |  | X | X |  |  |  | X |  |  |  |  |  |  | X | X | 9 |
| Gastrointestinal injury | X |  | X |  |  | X | X |  |  | X | X |  | X |  |  |  |  |  |  |  |  |  |  |  |  |  | 7 |
| Fistula formation |  |  | X |  | X | X |  |  |  |  |  |  |  |  |  |  |  | X |  |  |  |  |  |  |  |  | 4 |
| Reoperation |  |  |  |  |  | X |  |  |  |  |  |  |  | X |  |  |  |  |  |  |  |  |  |  |  |  | 2 |
| Postoperative infections | X |  |  |  | X | X | X |  |  |  |  |  |  | X |  |  |  | X |  |  |  |  |  |  | X |  | 7 |
| Blood transfusion |  |  |  |  | X | X |  |  |  | X |  |  | X | X |  |  |  | X |  |  | X | X |  |  | X |  | 9 |
| Postoperative febrile |  |  |  |  | X | X |  |  |  |  |  |  |  |  |  |  |  |  |  |  |  |  |  |  |  |  | 2 |
| Readmission |  |  |  |  |  | X | X |  |  |  |  | X |  |  |  |  |  |  |  |  |  |  |  |  |  |  | 3 |
| Death |  |  |  |  | X | X |  |  |  |  |  |  |  |  |  |  |  |  |  |  |  |  |  |  |  |  | 2 |
| Conversion to laparotomy |  |  |  |  | X |  |  | X |  | X | X |  | X |  |  |  |  |  |  |  |  |  |  | X | X |  | 7 |
| Difficult surgery |  |  |  |  |  |  |  |  |  |  |  |  |  |  |  |  |  |  |  | X |  |  |  |  |  |  | 1 |
| Total | 3 | 0 | 4 | 1 | 6 | 10 | 5 | 1 | 1 | 4 | 3 | 1 | 5 | 4 | 0 | 1 | 1 | 5 | 1 | 1 | 1 | 1 | 1 | 1 | 5 | 2 |  |
| **Adjusted analysis** |  |  |  |  |  |  |  |  |  |  |  |  |  |  |  |  |  |  |  |  |  |  |  |  |  |  |  |
| Urinary tract injury |  | X |  |  |  |  | X |  |  |  |  |  |  |  | X CC |  |  |  |  |  |  |  |  |  |  |  | 3 |
| Gastrointestinal injury |  |  |  |  |  |  | X |  |  |  |  |  |  |  |  |  |  |  |  |  |  |  |  |  |  |  | 1 |
| Readmission |  |  |  |  |  |  | X |  |  |  |  |  |  |  |  |  |  |  |  |  |  |  |  |  |  |  | 1 |
| Difficult surgery |  |  |  |  |  |  |  |  |  |  |  |  |  |  |  |  |  |  |  | X |  |  |  |  |  |  | 1 |
| Total | 0 | 1 | 0 | 0 | 0 | 0 | 3 | 0 | 0 | 0 | 0 | 0 | 0 | 0 | 1 | 0 | 0 | 0 | 0 | 1 | 0 | 0 | 0 | 0 | 0 | 0 |  |

**Note:** X, indicated the outcome presented in each study.

**Abbreviation:** (ref), reference number of each study cited in main text; CC Case-control study.

**Figure S1** Funnel plot of urinary tract injuries.
